# Supplementary material for: Phenylalanine conjugated supramolecular hydrogels developed from the mafenide and flurbiprofen multidrug for biological applications
Source: Royal Society of Chemistry journal article supplement (doi:10.1039/d2ob02300h), 2023-01-01
Supplement: d2ob02300h1.pdf [file d2ob02300h1.pdf]

Electronic Supplementary Information

**Phenylalanine Conjugated Supramolecular Hydrogel  
Developed from Mafenide and Flurbiprofen Multidrug for  
Biological Applications**

*Utsab Manna\*, Rajdip Roy, Abhishek Dutta, Nabanita Roy*

Address: *School of Chemical Sciences, Indian Association for the Cultivation of Science (IACS), 2A and 2B, Raja S. C. Mullick Road, Jadavpur, Kolkata - 700032, West Bengal, India*

E-mail: [utsabmanna1991@gmail.com](mailto:utsabmanna1991@gmail.com) , [csum2487@iacs.res.in](mailto:csum2487@iacs.res.in),

\*Corresponding author

*Table of Content*

|                                                                                                  |       |
|--------------------------------------------------------------------------------------------------|-------|
| Synthetic routes for the preparation of multidrug salts.....                                     | 2     |
| <sup>1</sup> H-NMR and <sup>13</sup> C-NMR spectra of acid bioconjugate and multidrug salts..... | 3-10  |
| ESI-Mass spectrometric data of flurbiprofen bioconjugates.....                                   | 11    |
| FT-IR spectra of acid bioconjugate and multidrug salts.....                                      | 12-14 |
| Gelation table and tanδ value table of all gels under study.....                                 | 15    |
| Amplitude sweep plots of all gels and T <sub>gel</sub> vs MGC plots of selected gels.....        | 16    |
| Optical images of all the gels attained in different solvents.....                               | 17    |
| Crystallographic data table of <b>FLR·AMN</b> multidrug.....                                     | 18    |
| Hydrogen bond data table and ORTEP-plot of <b>FLR·AMN</b> salt.....                              | 19    |
| Packing diagram from SXR and PXRD patterns of <b>FLR·AMN</b> .....                               | 20    |
| Biological studies of multidrug salts <b>FLR·PHE·MAF</b> .....                                   | 21-22 |

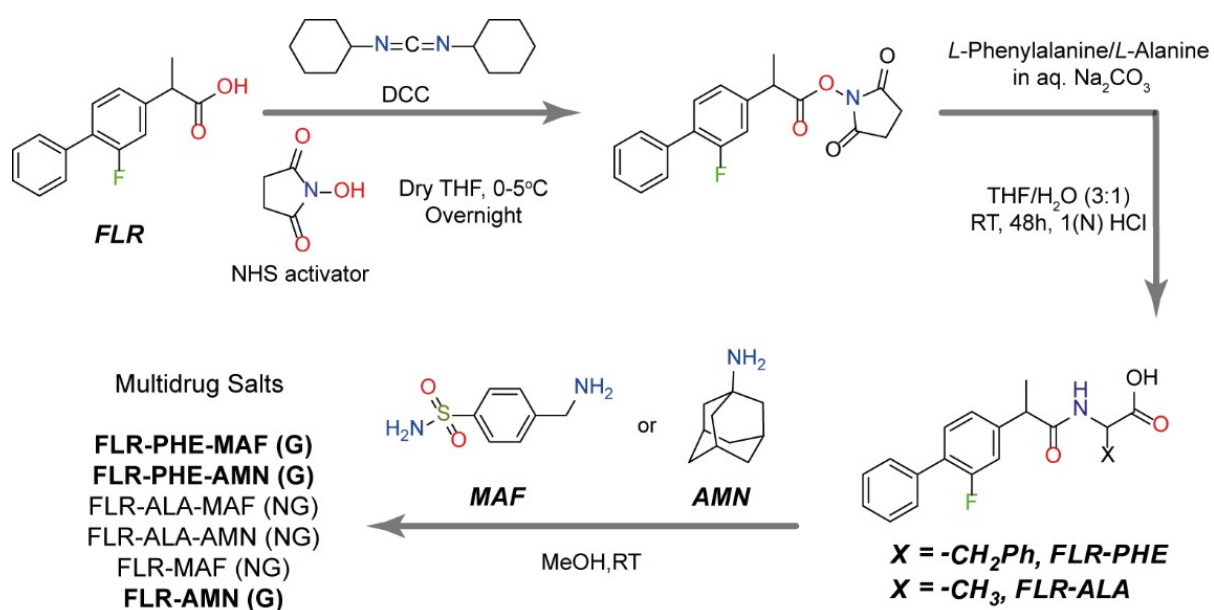

**Scheme S1:** General synthetic routes for the preparation of various multidrug salts studied herein.

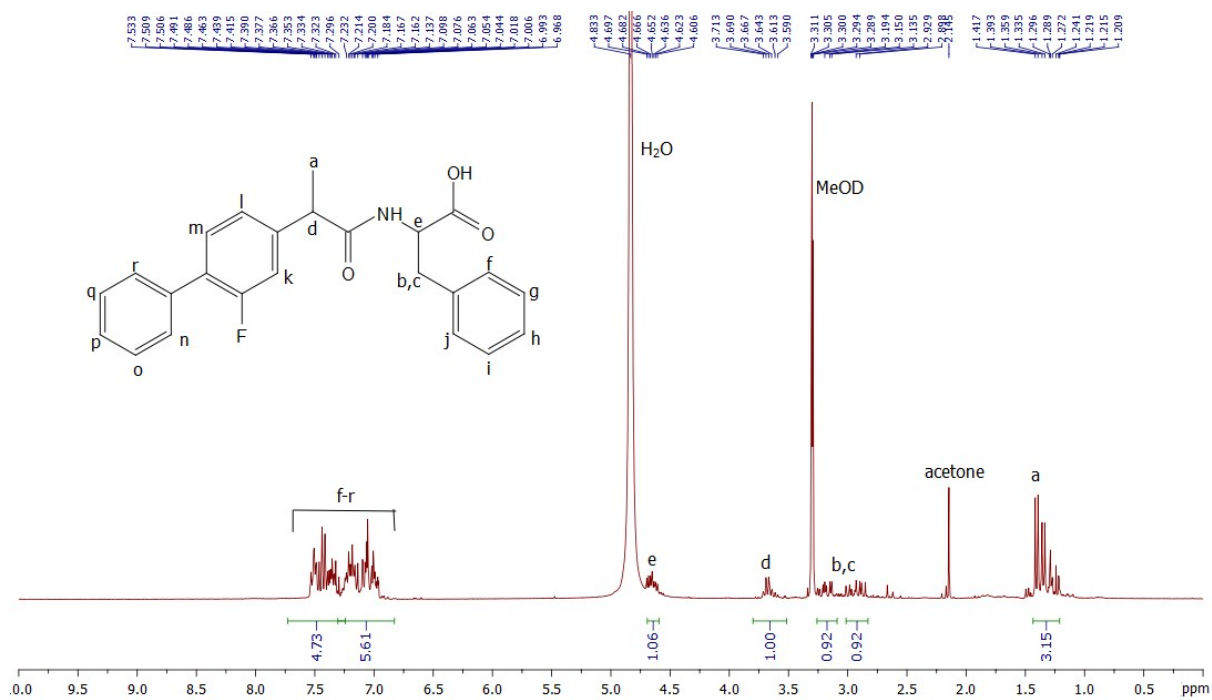

Figure S1: <sup>1</sup>H-NMR spectra of FLR·PHE acid in MeOD.

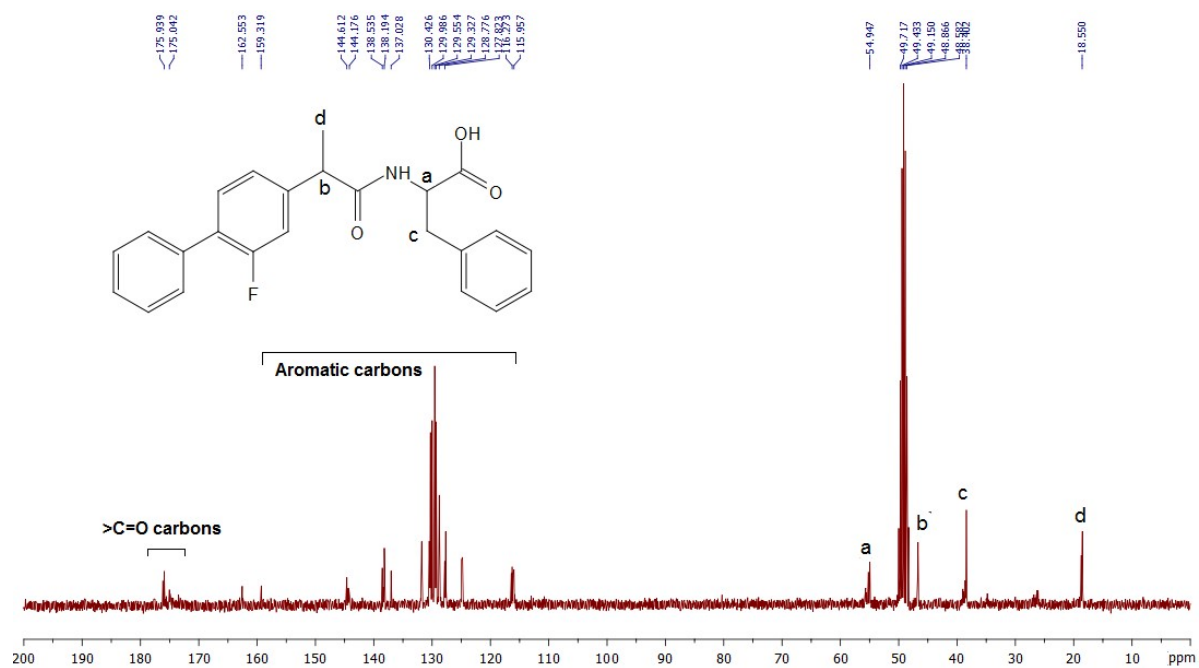

Figure S2: <sup>13</sup>C-NMR spectra of FLR·PHE acid in MeOD.

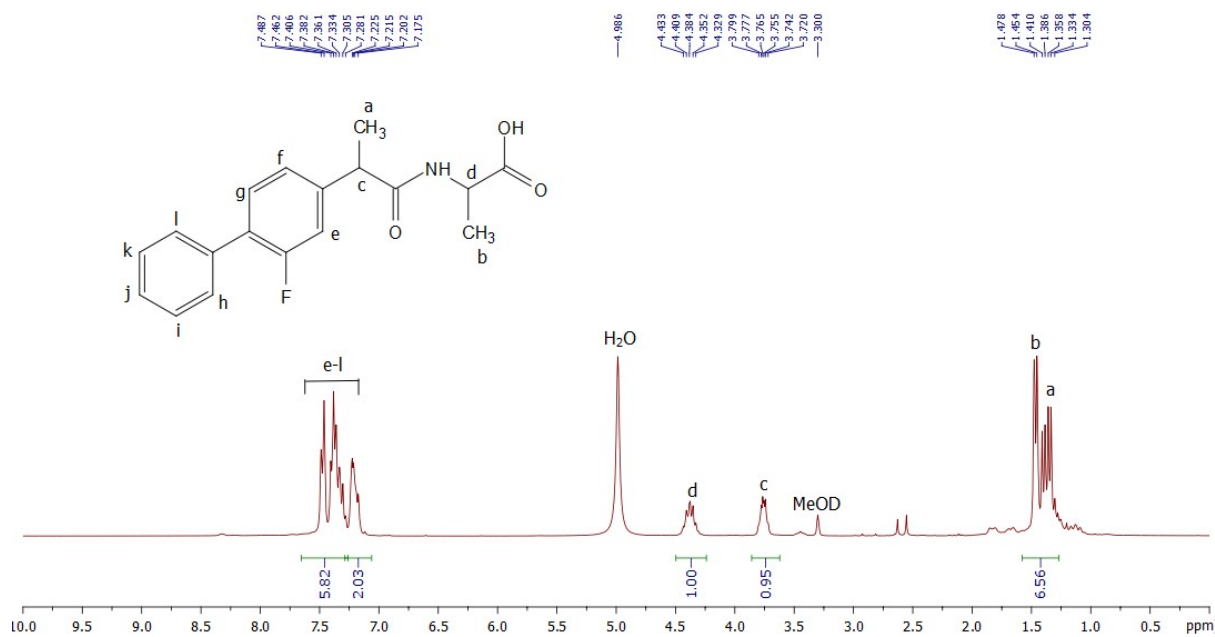

Figure S3: <sup>1</sup>H-NMR spectra of FLR·ALA acid in MeOD.

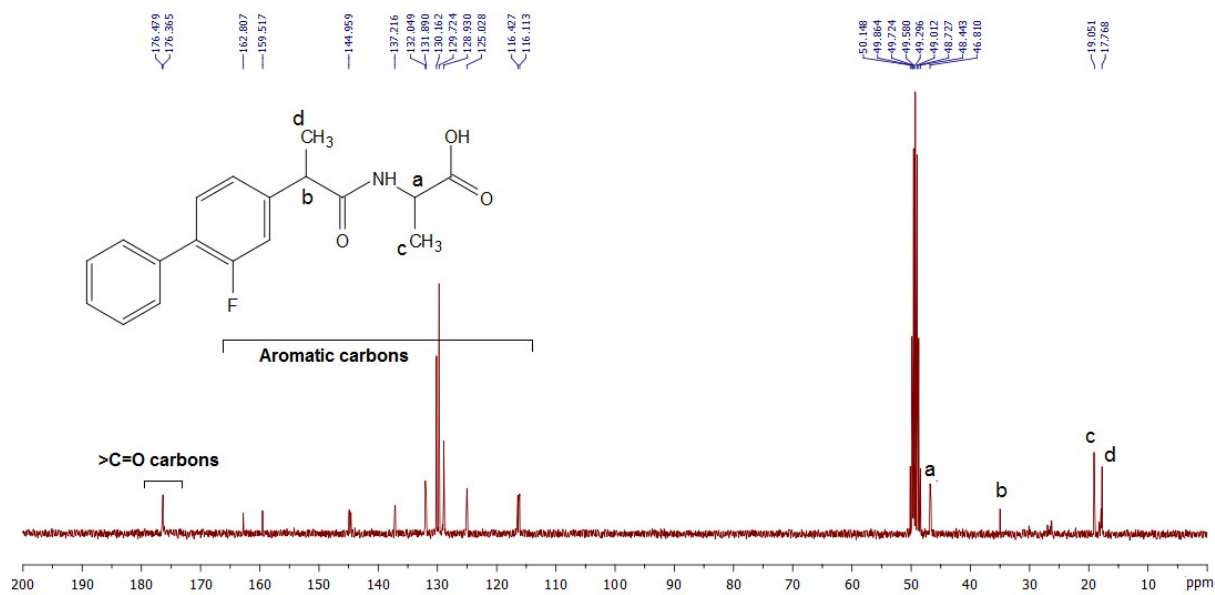

Figure S4: <sup>13</sup>C-NMR spectra of FLR·ALA acid in MeOD.

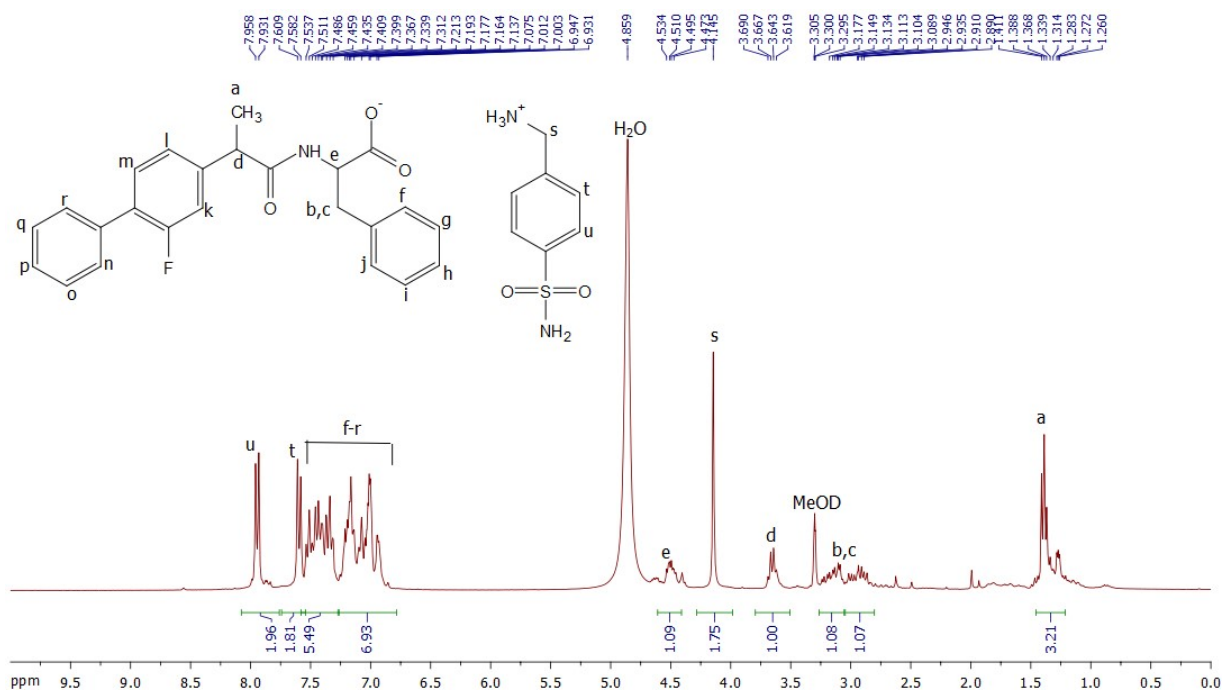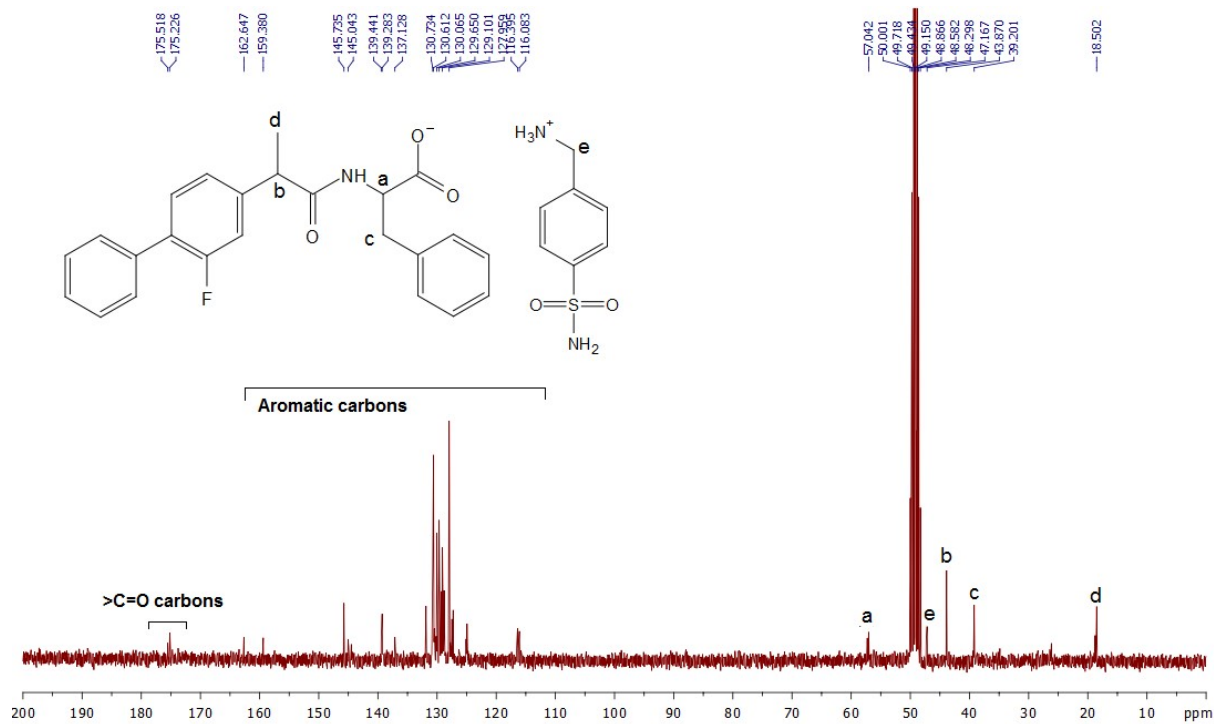

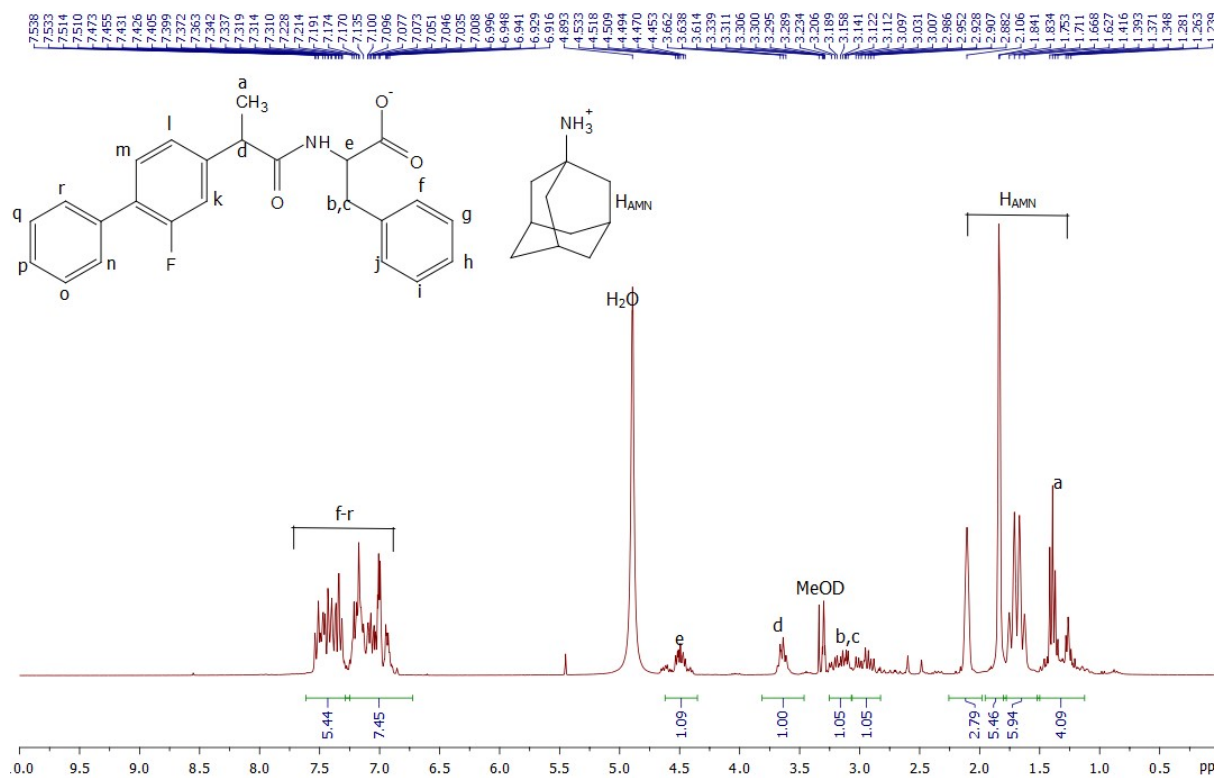

Figure S7: <sup>1</sup>H-NMR spectra of multidrug salt FLR·PHE·AMN in MeOD.

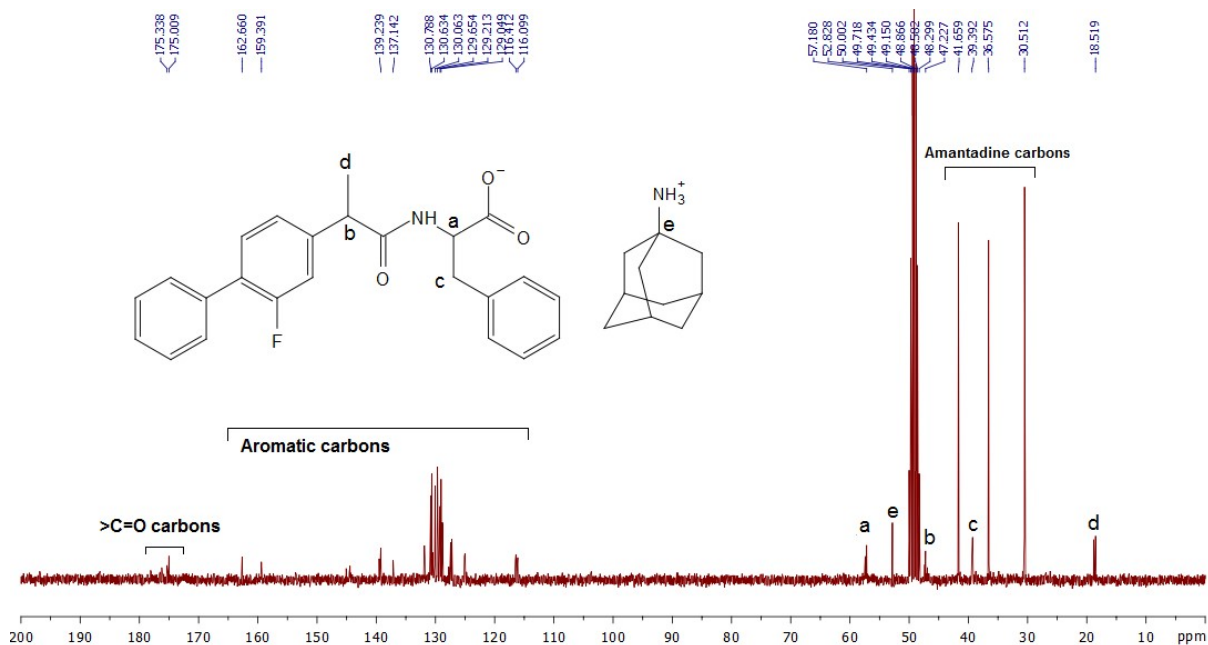

Figure S8: <sup>13</sup>C-NMR spectra of multidrug salt FLR·PHE·AMN in MeOD.

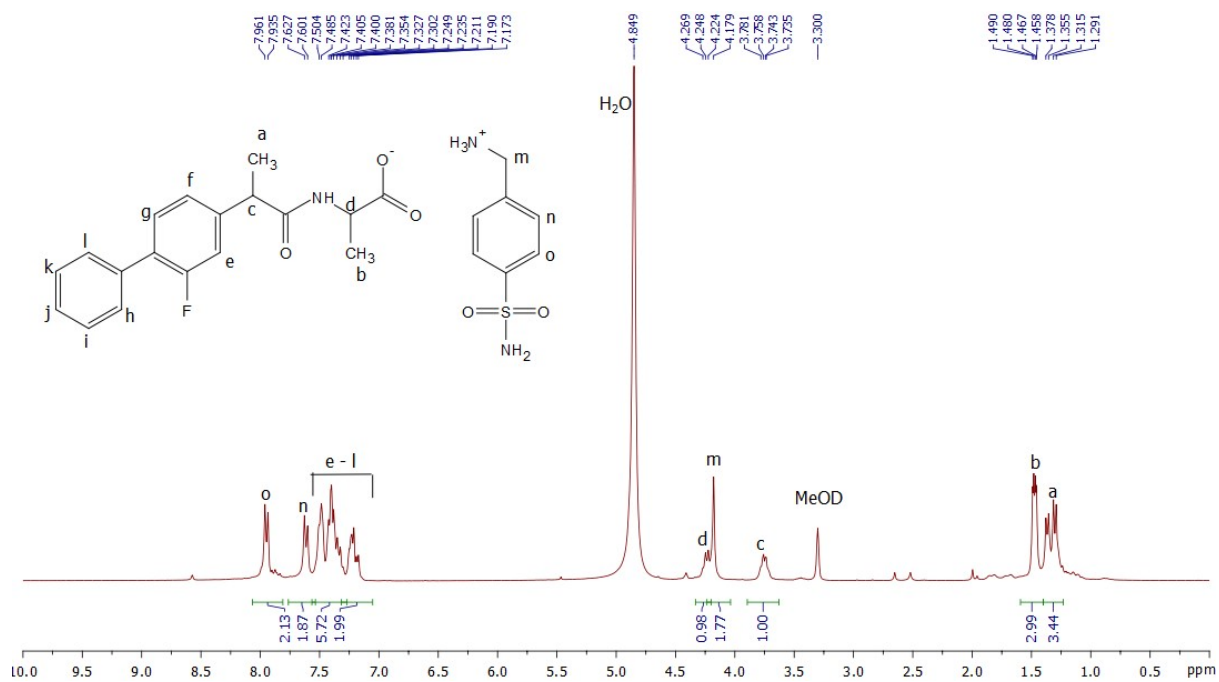

Figure S9:  $^1\text{H}$ -NMR spectra of multidrug salt **FLR·ALA·MAF** in MeOD.

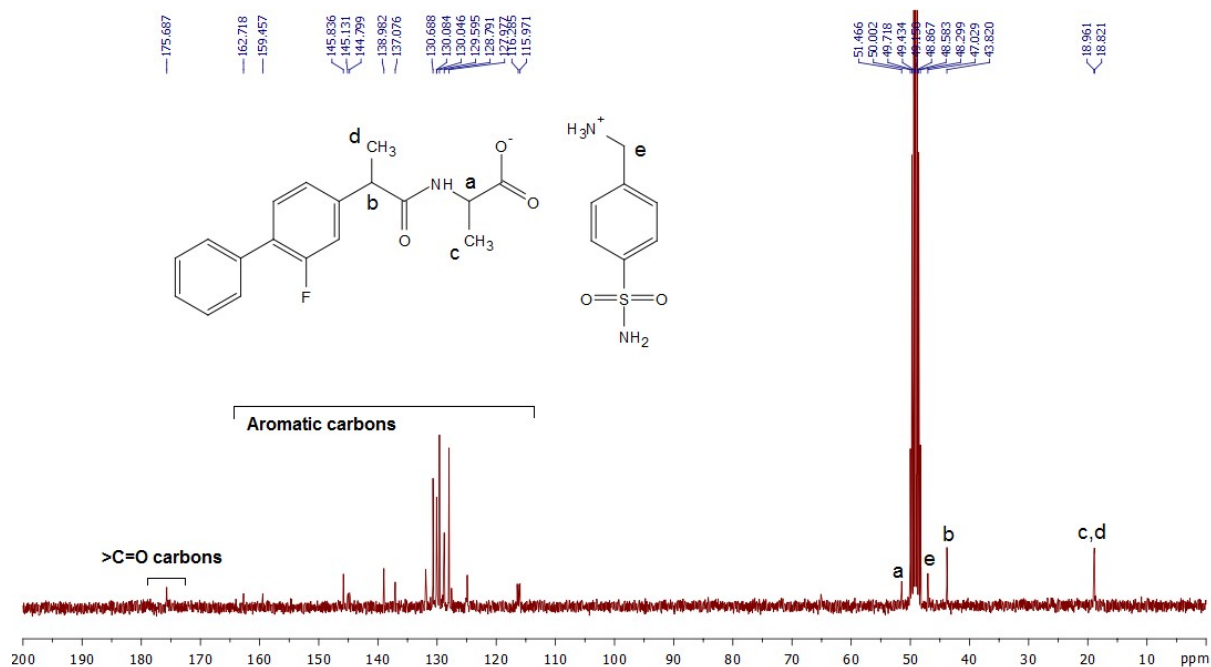

Figure S10:  $^{13}\text{C}$ -NMR spectra of multidrug salt **FLR·ALA·MAF** in MeOD.



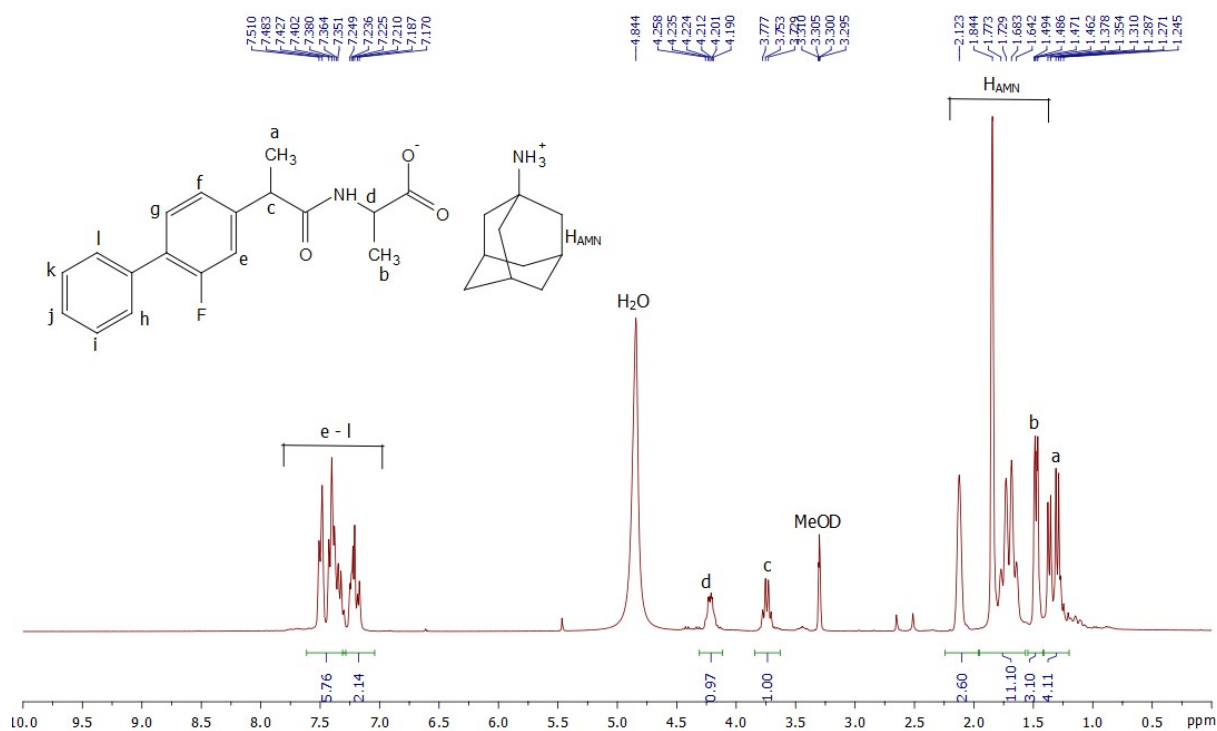

**Figure S11:** <sup>1</sup>H-NMR spectra of multidrug salt FLR·ALA·AMN in MeOD.

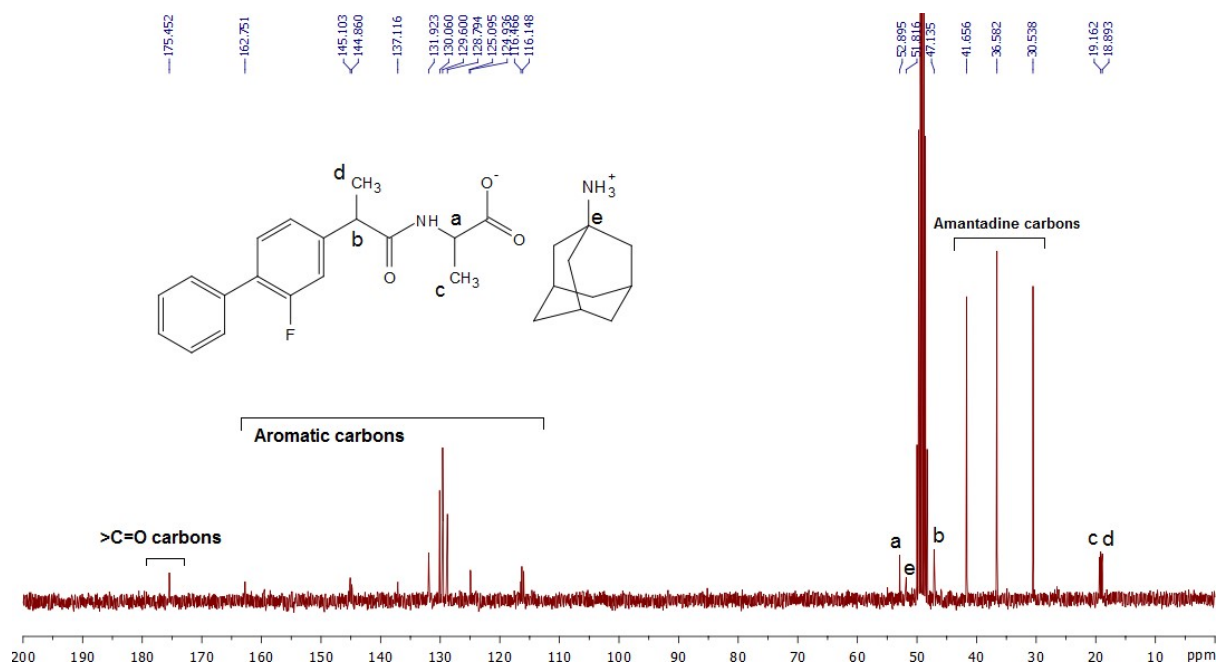

**Figure S12:** <sup>13</sup>C-NMR spectra of multidrug salt FLR·ALA·AMN in MeOD.



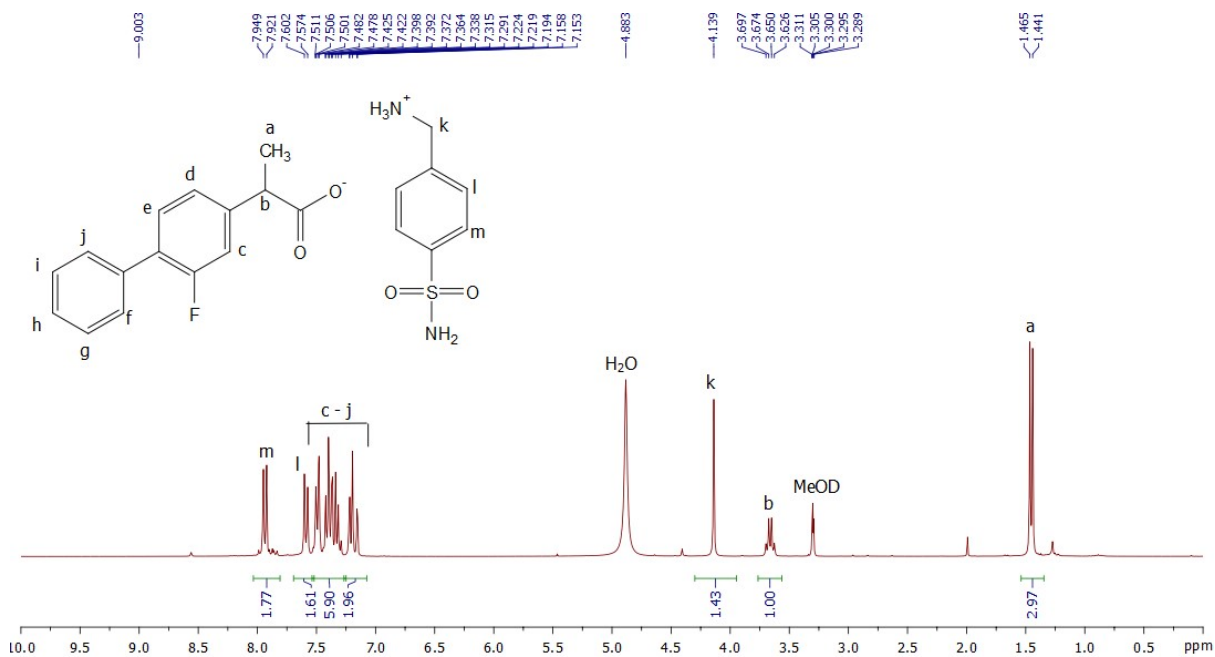

**Figure S13:** <sup>1</sup>H-NMR spectra of multidrug salt FLR·MAF in MeOD.

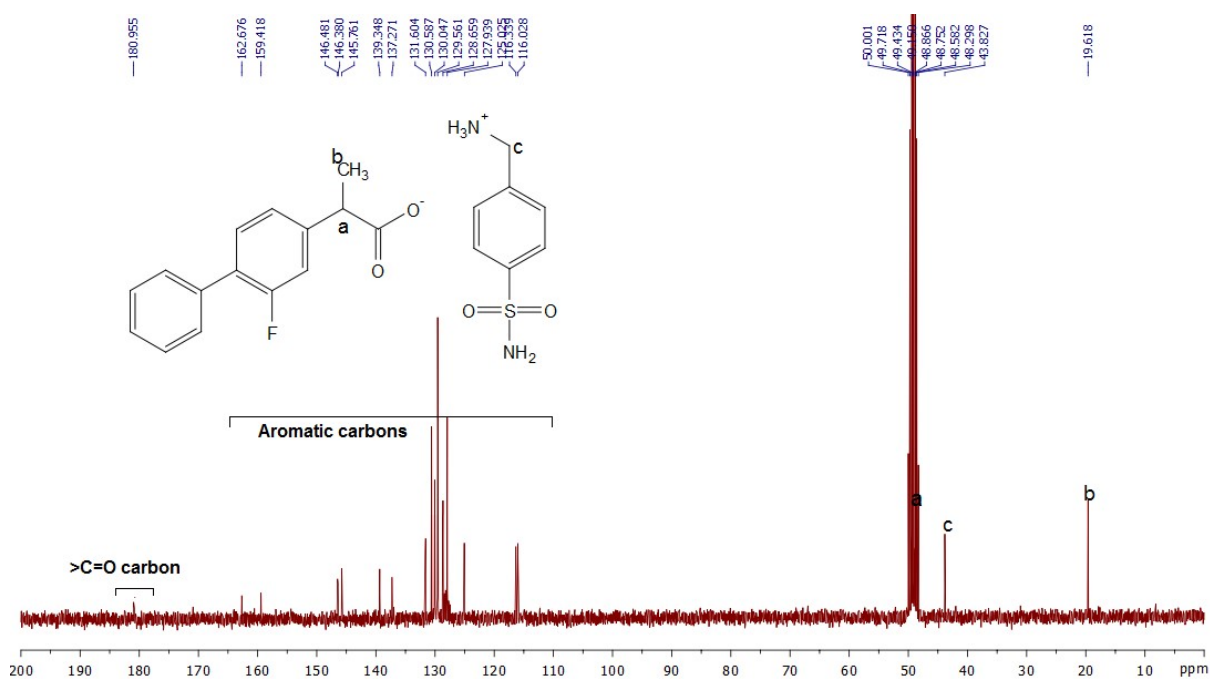

**Figure S14:** <sup>13</sup>C-NMR spectra of multidrug salt FLR·MAF in MeOD.

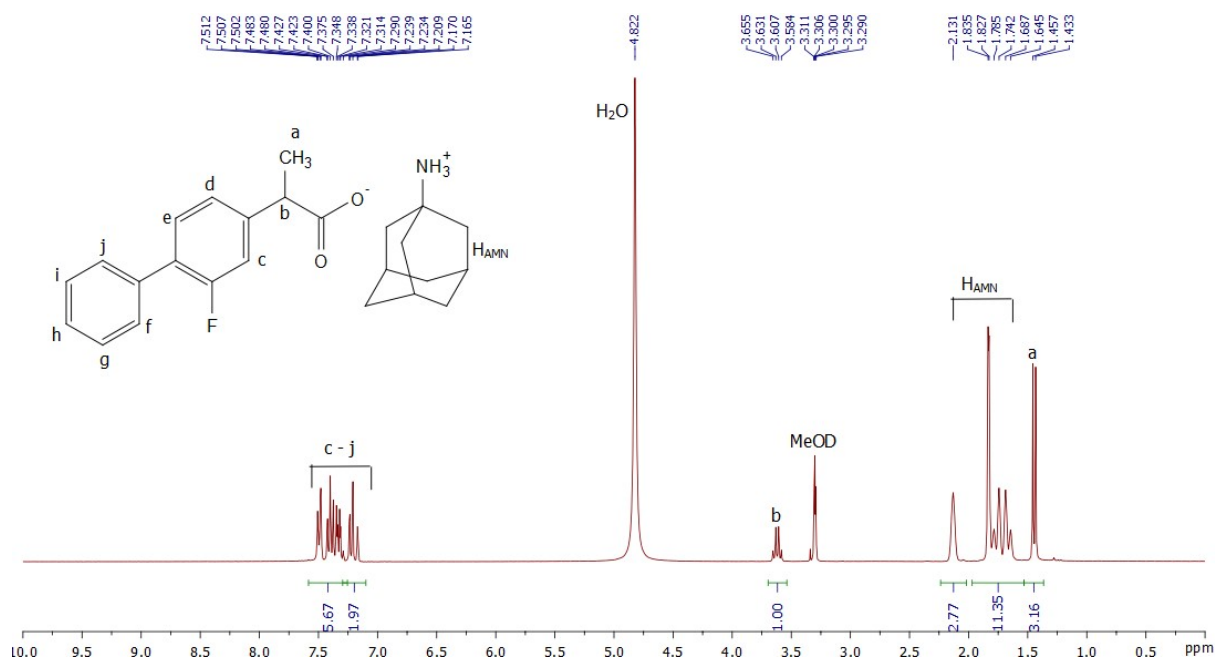

**Figure S15:** <sup>1</sup>H-NMR spectra of multidrug salt **FLR·AMN** in MeOD.

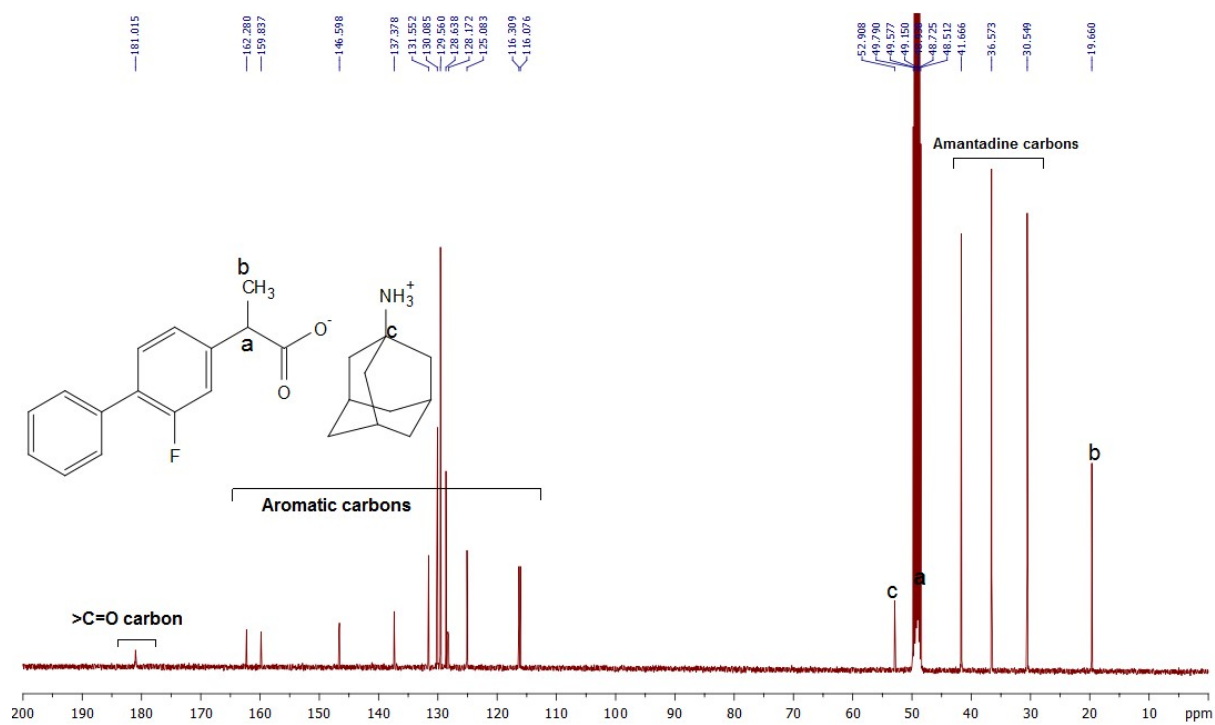

**Figure S16:** <sup>13</sup>C-NMR spectra of multidrug salt **FLR·AMN** in MeOD.

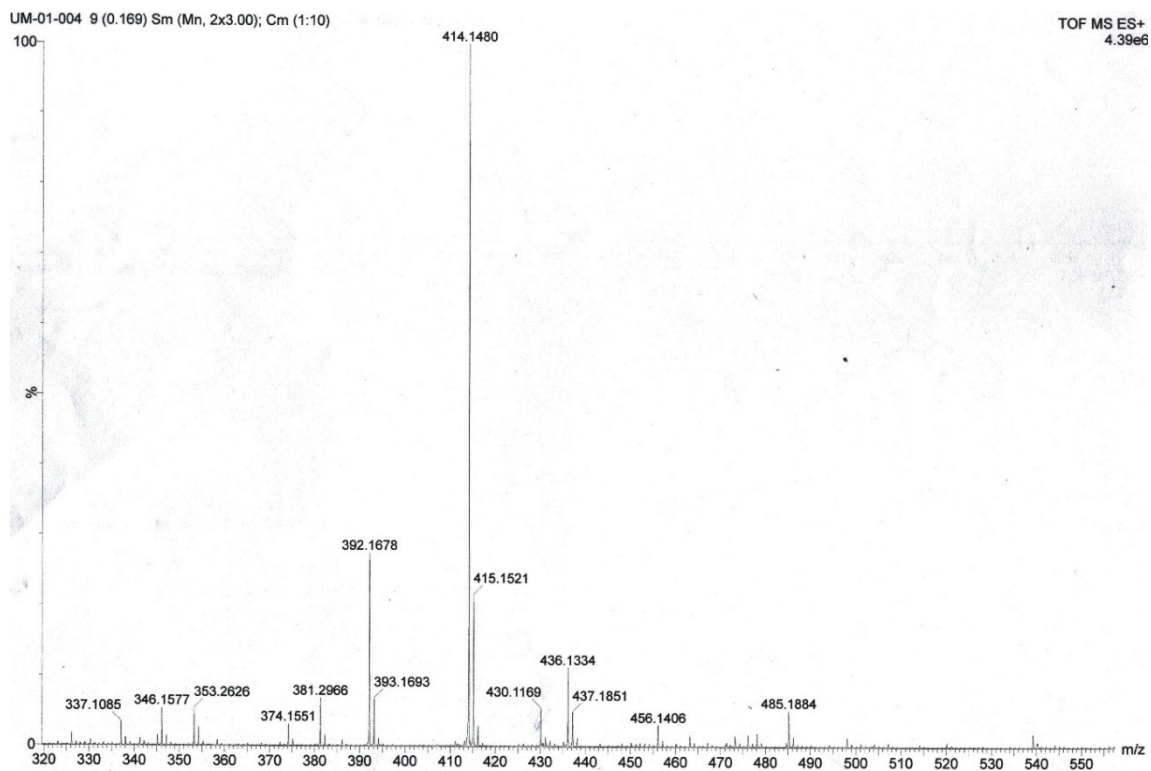

**Figure S17:** ESI-MS spectra of **FLR·PHE** acid. (MW = 390.4350) HRMS, ESI (CH<sub>3</sub>OH) *m/z* (100%): calculated for [(C<sub>24</sub>H<sub>22</sub>FNO<sub>3</sub>)]<sup>+</sup>[M+Na]<sup>+</sup>: 414.15; found: 414.1480.

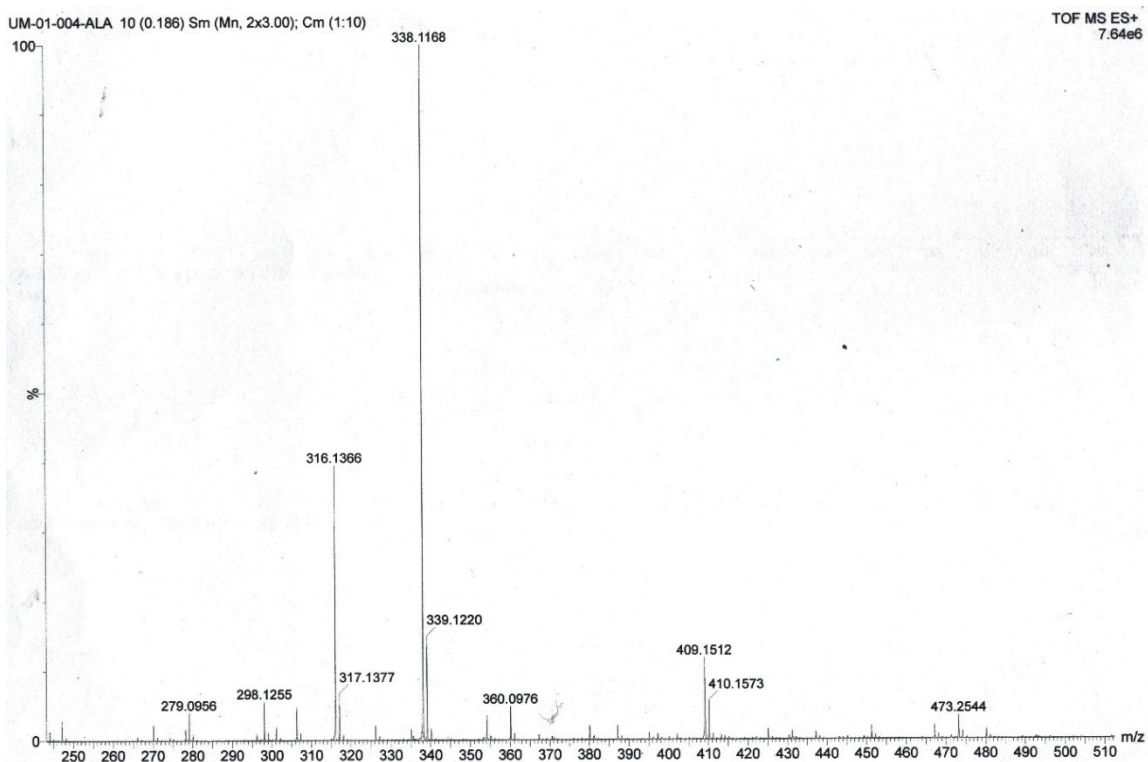

**Figure S18:** ESI-MS spectra of **FLR·ALA** acid. (MW = 314.3370) HRMS, ESI (CH<sub>3</sub>OH) *m/z* (100%): calculated for [(C<sub>18</sub>H<sub>18</sub>FNO<sub>3</sub>)]<sup>+</sup>[M+Na]<sup>+</sup>: 338.12; found: 338.1168.

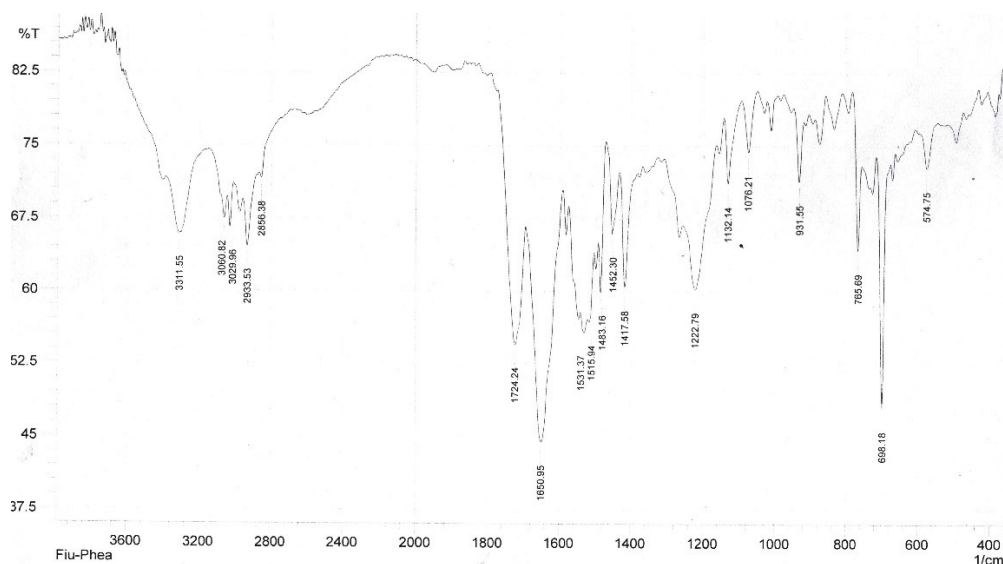

**Figure S19:** FT-IR spectra of **FLR·PHE** acid. Characteristic  $>C=O_{COOH}$  peak at  $1724.24\text{ cm}^{-1}$ .

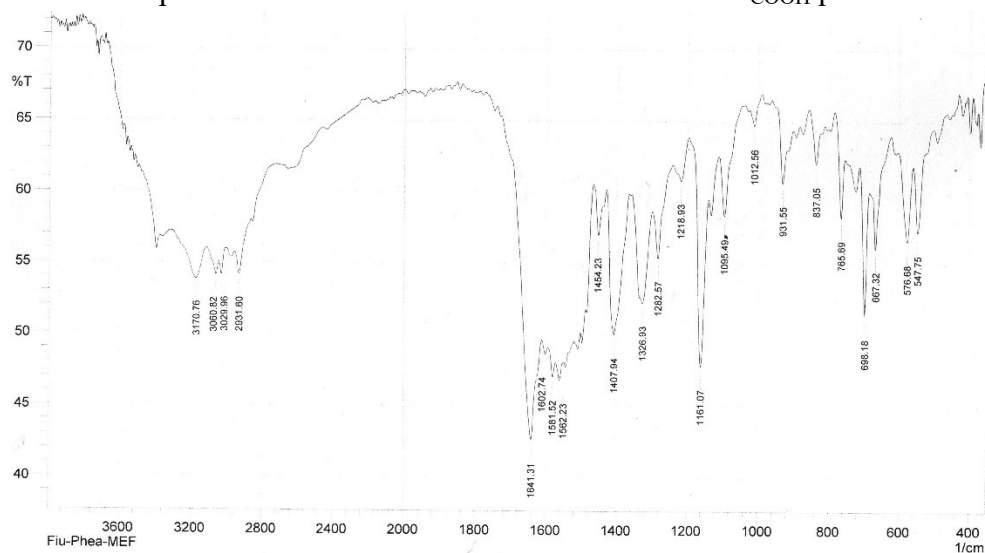

**Figure S20:** FT-IR spectra of **FLR·PHE·MAF** multidrug salt with the presence of characteristic  $>C=O_{COO-}$  peak at  $1641.31\text{ cm}^{-1}$  followed by the absence of  $>C=O_{COOH}$  peak.

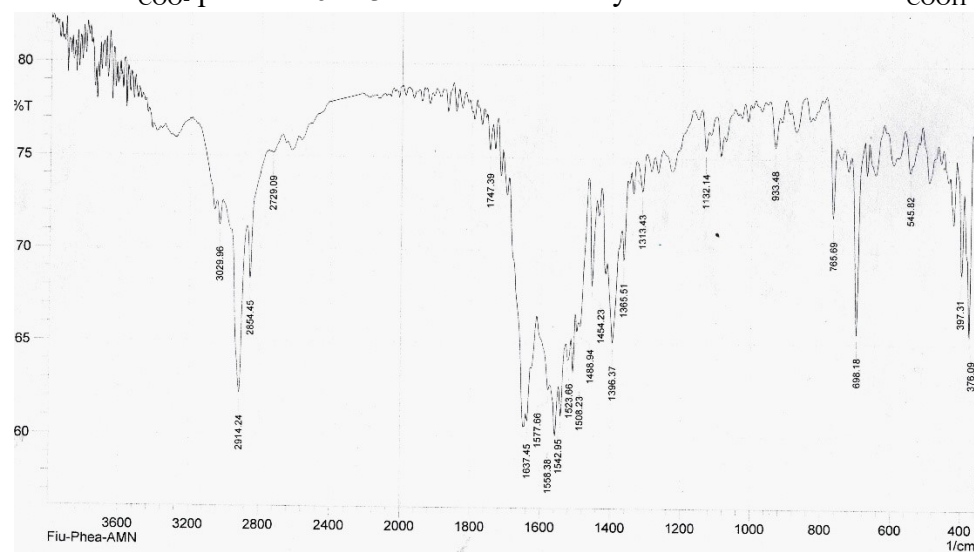

**Figure S21:** FT-IR spectra of **FLR·PHE·AMN** multidrug salt with the presence of characteristic  $>C=O_{COO-}$  peak at  $1637.45\text{ cm}^{-1}$  followed by the absence of  $>C=O_{COOH}$  peak.

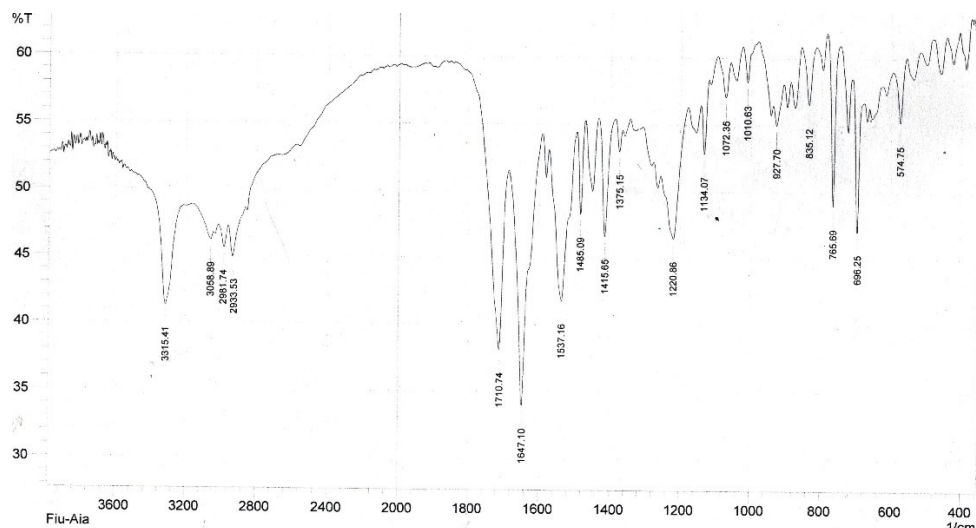

**Figure S22:** FT-IR spectra of **FLR·ALA** acid. Characteristic  $>C=O_{COOH}$  peak at  $1710.74\text{ cm}^{-1}$ .

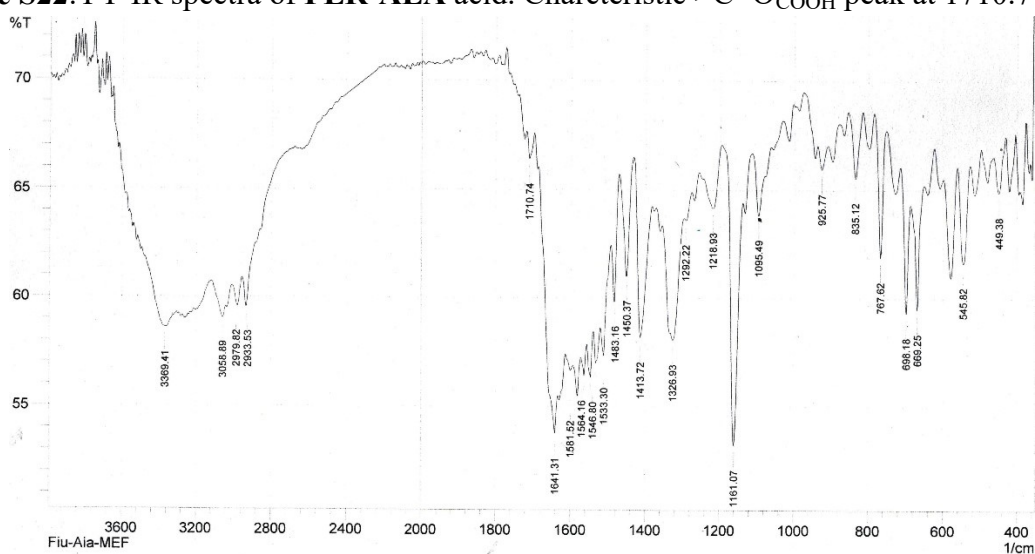

**Figure S23:** FT-IR spectra of **FLR·ALA·MAF** multidrug salt with the presence of characteristic  $>C=O_{COO-}$  peak at  $1641.31\text{ cm}^{-1}$  followed by the absence of  $>C=O_{COOH}$  peak.

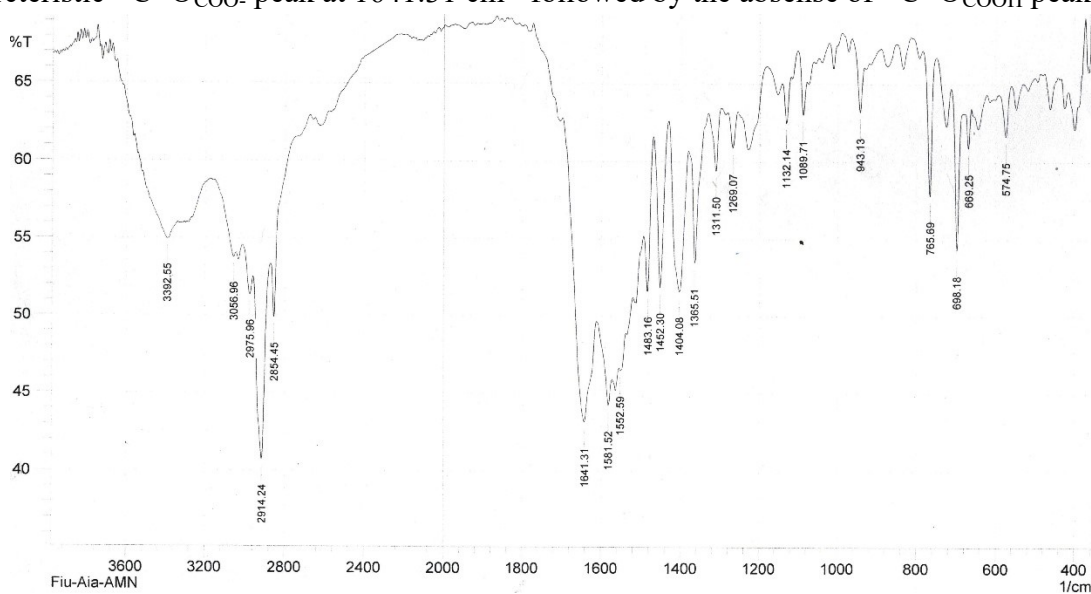

**Figure S24:** FT-IR spectra of **FLR·ALA·AMN** multidrug salt with the presence of characteristic  $>C=O_{COO-}$  peak at  $1641.31\text{ cm}^{-1}$  followed by the absence of  $>C=O_{COOH}$  peak.



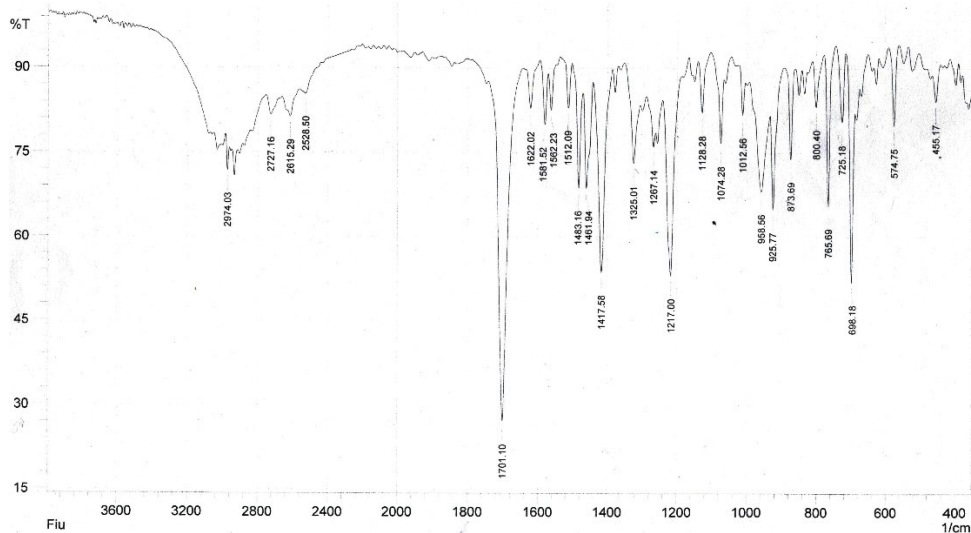

**Figure S25:** FT-IR spectra of FLR acid. Characteristic  $>C=O_{COOH}$  peak at  $1701.10\text{ cm}^{-1}$ .

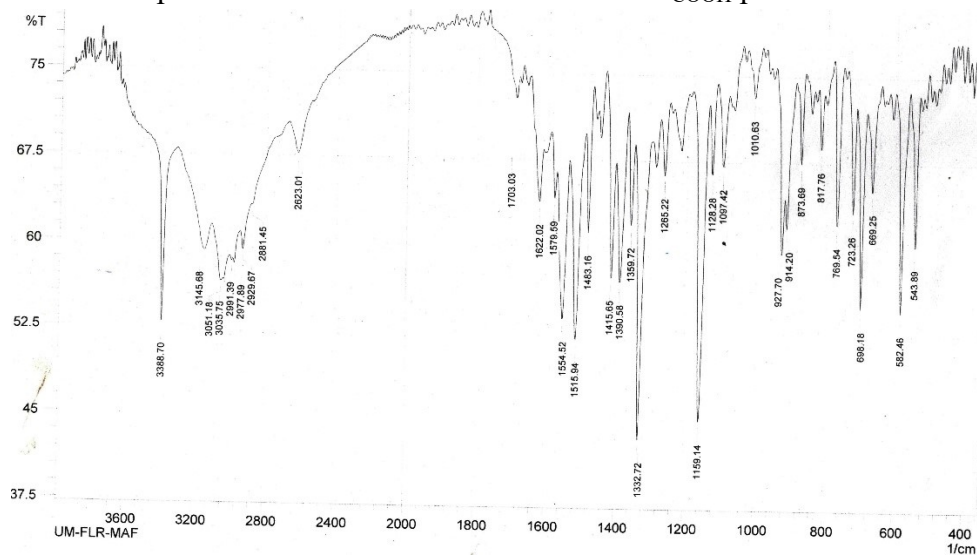

**Figure S26:** FT-IR spectra of FLR·MAF multidrug salt with the presence of characteristic  $>C=O_{COO}$  peak at  $1622.02\text{ cm}^{-1}$  followed by the absence of  $>C=O_{COOH}$  peak.

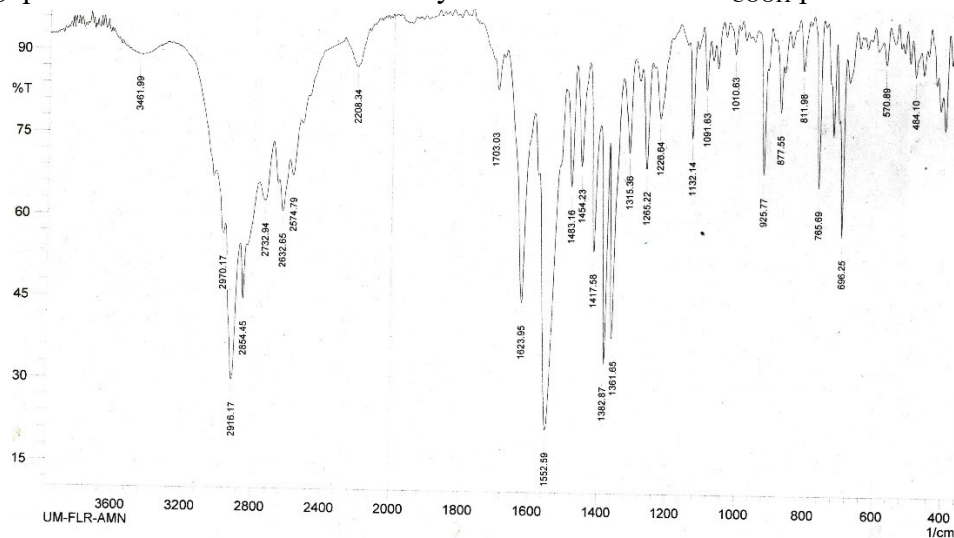

**Figure S27:** FT-IR spectra of FLR·AMN multidrug salt with the presence of characteristic  $>C=O_{COO}$  peak at  $1623.95\text{ cm}^{-1}$  followed by the absence of  $>C=O_{COOH}$  peak.

**Table S1:** Gelation data table of multidrug salts studied herein:

| Gelation Solvents   | FLR-PHE-MAF                                         | FLR-PHE-AMN                                                       | FLR-ALA-MAF | FLR-ALA-AMN | FLR-MAF | FLR-AMN    |
|---------------------|-----------------------------------------------------|-------------------------------------------------------------------|-------------|-------------|---------|------------|
| Bromobenzene        | WG                                                  | GP                                                                | GP          | GP          | GP      | <b>GEL</b> |
| Chlorobenzene       | WG                                                  | GP                                                                | WG          | INS         | GP      | WG         |
| 1,2-Dichlorobenzene | WG                                                  | CF                                                                | GP          | GP          | GP      | WG         |
| Toluene             | <b>GEL</b>                                          | WG                                                                | INS         | INS         | GP      | GP         |
| <i>o</i> -Xylene    | WG                                                  | <b>GEL</b>                                                        | WG          | WG          | GP      | WG         |
| <i>m</i> -Xylene    | WG                                                  | <b>GEL</b>                                                        | WG          | GP          | GP      | GP         |
| <i>p</i> -Xylene    | WG                                                  | <b>GEL</b>                                                        | WG          | GP          | GP      | WG         |
| Mesitylene          | GP                                                  | WG                                                                | INS         | WG          | GP      | WG         |
| Nitrobenzene        | GP                                                  | <b>GEL</b>                                                        | GP          | WG          | GP      | <b>GEL</b> |
| Methyl salicylate   | WG                                                  | <b>GEL</b> (2.5 <sup>a</sup> , 94-95 <sup>°C</sup> <sup>b</sup> ) | PS          | GP          | WG/CF   | <b>GEL</b> |
| Water               | <b>GEL</b> (3.5, 80-82 <sup>°C</sup> <sup>b</sup> ) | WG                                                                | INS         | INS         | INS     | INS        |

Note: <sup>a</sup>MGC, <sup>b</sup>T<sub>Gel</sub>, WG: weak gel, GP: gelatinous precipitate, CF: crystalline fibre, INS: insoluble, PS: partially soluble.

**Table S2:** tan $\delta$  value table of hydrogel and all the organogels of multidrug salts under study:

| Gels                   | G' (KPa) | G'' (KPa) | tan $\delta$ |
|------------------------|----------|-----------|--------------|
| <b>FLR·PHE·MAF-HG</b>  | 5.95     | 1.63      | 0.27         |
| <b>FLR·PHE·MAF-TOL</b> | 1.28     | 0.40      | 0.31         |
| <b>FLR·PHE·AMN-MS</b>  | 90.32    | 12.05     | 0.13         |
| <b>FLR·PHE·AMN-NB</b>  | 6.83     | 1.65      | 0.24         |
| <b>FLR·PHE·AMN-OXY</b> | 8.92     | 1.19      | 0.13         |
| <b>FLR·PHE·AMN-MXY</b> | 35.25    | 4.96      | 0.14         |
| <b>FLR·PHE·AMN-PXY</b> | 8.81     | 1.45      | 0.16         |
| <b>FLR·AMN-MS</b>      | 0.73     | 0.40      | 0.23         |
| <b>FLR·AMN-NB</b>      | 5.29     | 1.48      | 0.28         |
| <b>FLR·AMN-BB</b>      | 3.41     | 1.01      | 0.30         |



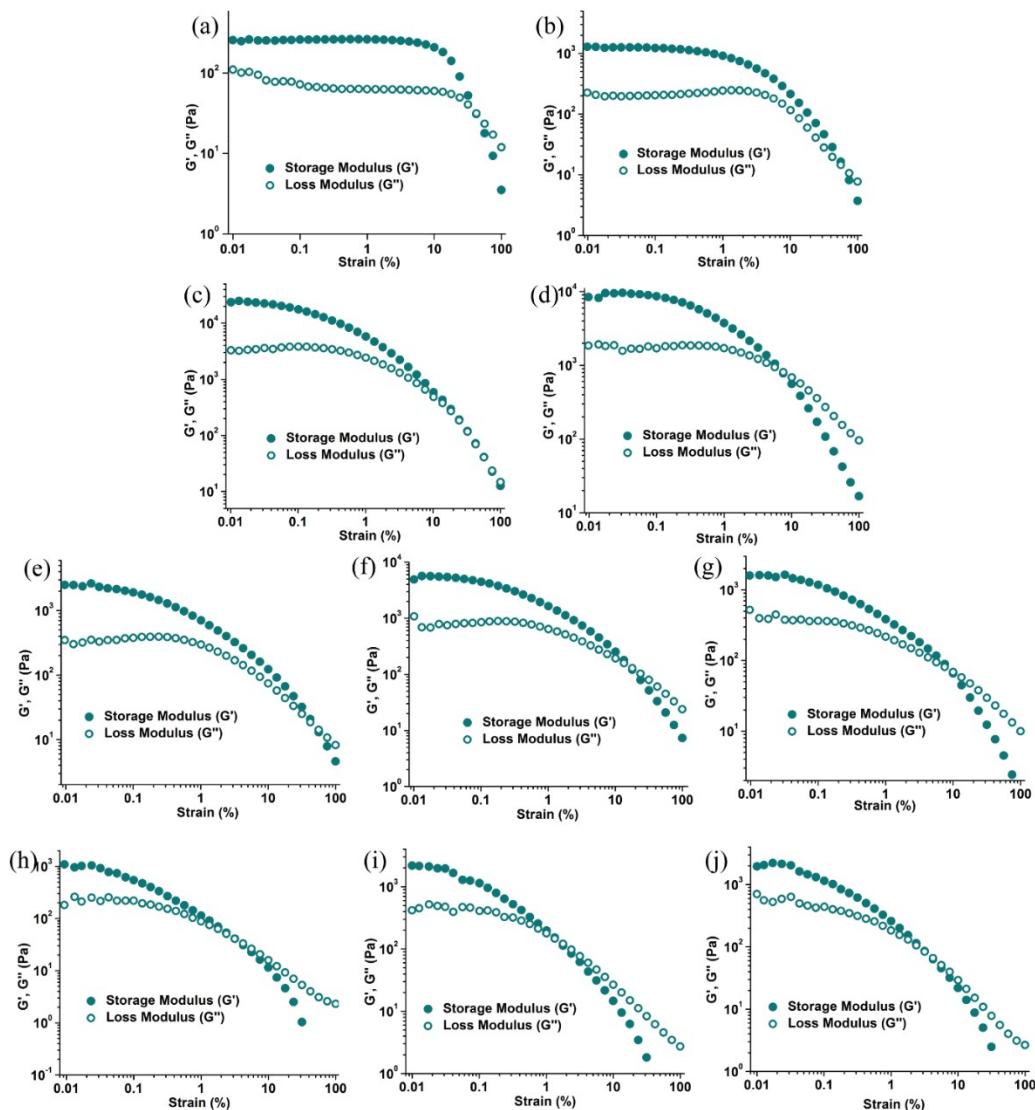

**Figure S28:** Strain sweep or amplitude sweep plots of all the gels under study (a) FLR-PHE-MAF-HG, (b) FLR-PHE-MAF-TOL, (c) FLR-PHE-AMN-MS, (d) FLR-PHE-AMN-NB, (e) FLR-PHE-AMN-OXY, (f) FLR-PHE-AMN-MXY, (g) FLR-PHE-AMN-PXY, (h) FLR-AMN-MS, (i) FLR-AMN-NB and (j) FLR-AMN-BB.

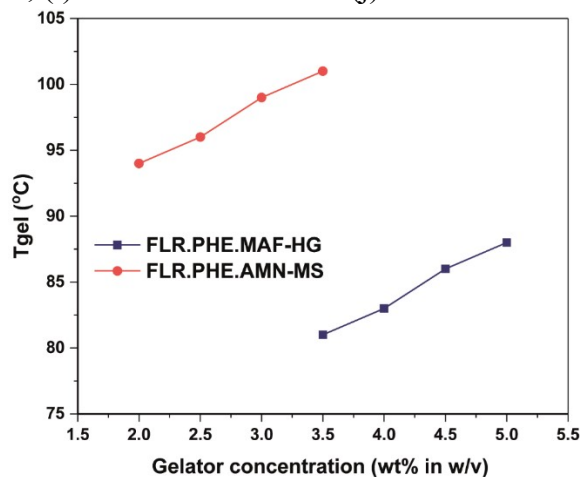

**Figure S29:**  $T_{gel}$  vs [gelator] plot of FLR-PHE-MAF-HG and FLR-PHE-AMN-MS.

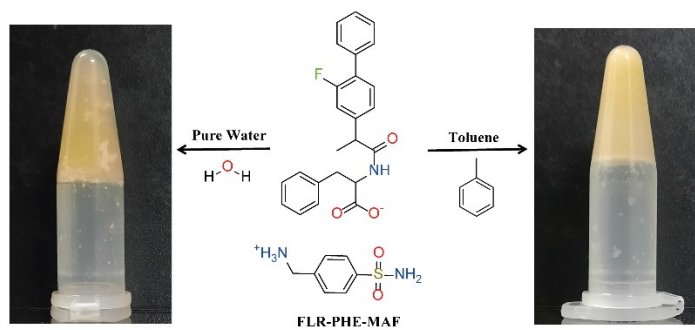

**Figure S30:** Optical images of pure hydrogel and toluene gel of **FLR·PHE·MAF** multidrug.

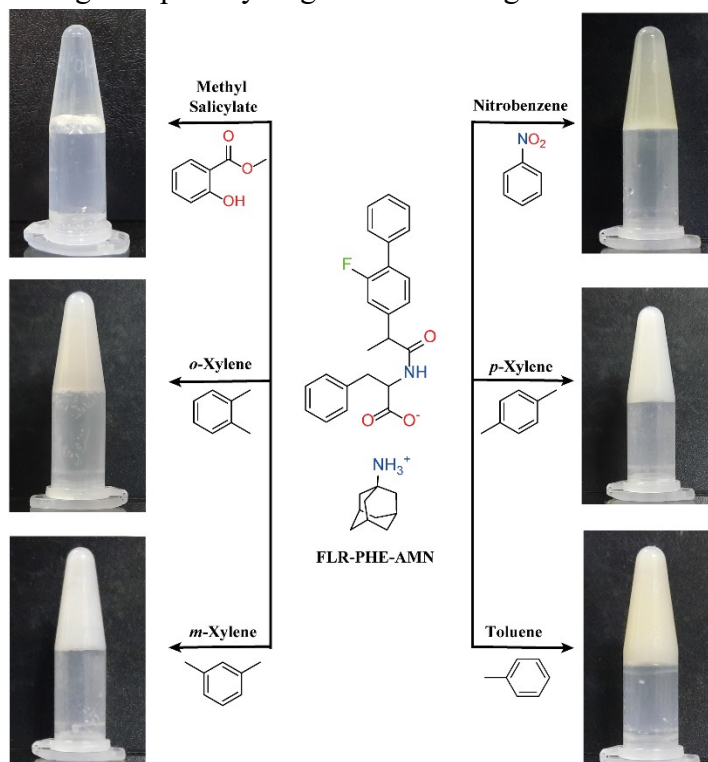

**Figure S31:** Optical images of MS and other organogels of **FLR·PHE·AMN** multidrug.

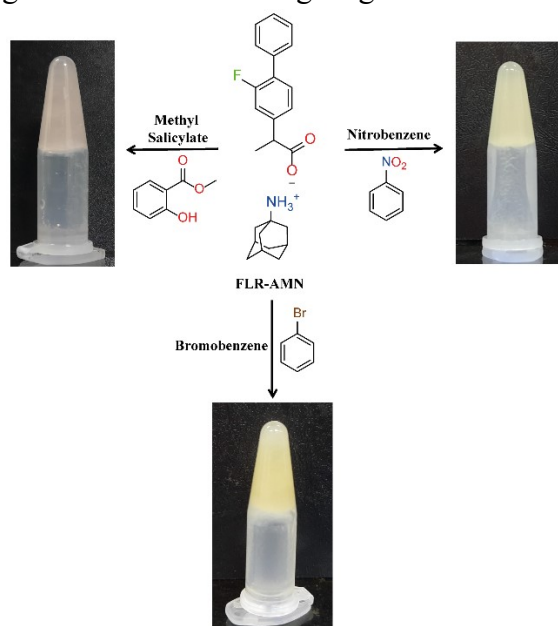

**Figure S32:** Optical images of MS and other organogels of **FLR·AMN** multidrug.

**Table S3:** Crystallographic data parameters for the single crystal of **FLR·AMN** salt:

| Parameters                                  | <b>FLR·AMN</b>                                                |
|---------------------------------------------|---------------------------------------------------------------|
| CCDC No.                                    | 2192760                                                       |
| Empirical formula                           | C <sub>25</sub> H <sub>30</sub> FNO <sub>2</sub>              |
| Formula weight                              | 395.50                                                        |
| Temperature/K                               | 145.15                                                        |
| Crystal system                              | orthorhombic                                                  |
| Space group                                 | <i>P</i> 2 <sub>1</sub> 2 <sub>1</sub> 2 <sub>1</sub>         |
| a/Å                                         | 6.3673(13)                                                    |
| b/Å                                         | 16.941(3)                                                     |
| c/Å                                         | 19.629(4)                                                     |
| α/°                                         | 90                                                            |
| β/°                                         | 90                                                            |
| γ/°                                         | 90                                                            |
| Volume/Å <sup>3</sup>                       | 2117.3(7)                                                     |
| Z                                           | 4                                                             |
| ρ <sub>calc</sub> /cm <sup>3</sup>          | 1.241                                                         |
| μ/mm <sup>-1</sup>                          | 0.084                                                         |
| F(000)                                      | 848.0                                                         |
| Crystal size/mm <sup>3</sup>                | 0.12 × 0.03 × 0.02                                            |
| Radiation                                   | MoKα (λ = 0.71073)                                            |
| 2θ range for data collection/°              | 4.796 to 49.994                                               |
| Index ranges                                | -7 ≤ h ≤ 7, -20 ≤ k ≤ 19, -23 ≤ l ≤ 23                        |
| Reflections collected                       | 19709                                                         |
| Independent reflections                     | 3739 [R <sub>int</sub> = 0.1071, R <sub>sigma</sub> = 0.0825] |
| Data/restraints/parameters                  | 3739/1/261                                                    |
| Goodness-of-fit on F <sup>2</sup>           | 1.198                                                         |
| Final R indexes [I ≥ 2σ (I)]                | R <sub>1</sub> = 0.1653, wR <sub>2</sub> = 0.3936             |
| Final R indexes [all data]                  | R <sub>1</sub> = 0.2053, wR <sub>2</sub> = 0.4309             |
| Largest diff. peak/hole / e Å <sup>-3</sup> | 1.30/-0.55                                                    |

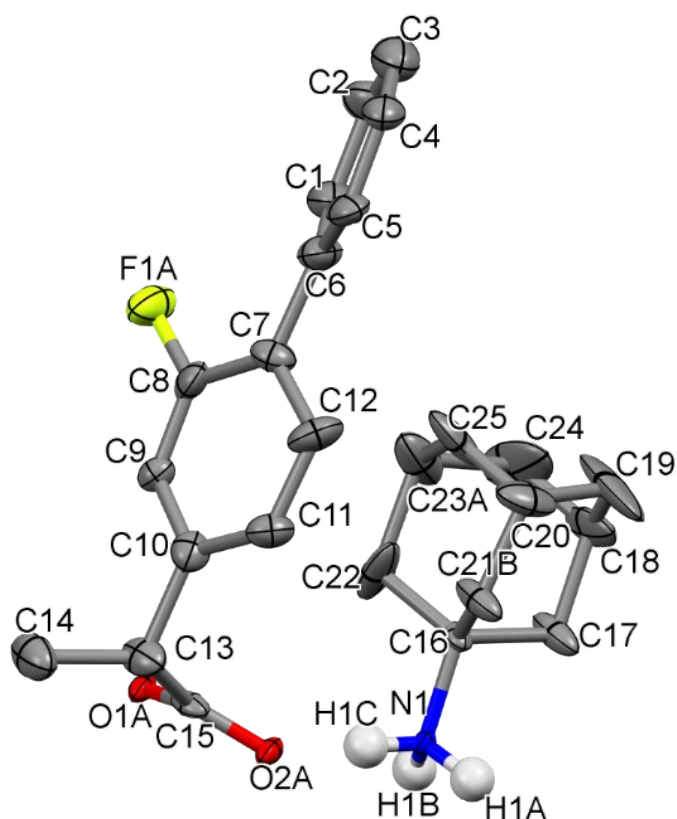

**Figure S33:** ORTEP-plot of **FLR·AMN** multidrug salt bearing H-atoms participating hydrogen bond network formation.

**Table S4:** Hydrogen-bond data table for the single crystal of **FLR·AMN** salt:

| Bisamide | D-H...A      | <i>d</i> (D-H)<br>(Å) | <i>d</i> (H...A)<br>(Å) | <i>d</i> (D...A)<br>(Å) | ∠D-H...A<br>(°) | Symmetry<br>operator |
|----------|--------------|-----------------------|-------------------------|-------------------------|-----------------|----------------------|
| FLR·AMN  | N1-H1A...O1A | 0.91                  | 1.90                    | 2.782(14)               | 163             | -1/2+x,3/2-y,2-z     |
|          | N1-H1A...O1B | 0.91                  | 2.05                    | 2.880 (2)               | 151             | -1/2+x,3/2-y,2-z     |
|          | N1-H1B...O2A | 0.91                  | 1.91                    | 2.793 (15)              | 162             | 1/2+x,3/2-y,2-z      |
|          | N1-H1B...O2B | 0.91                  | 1.83                    | 2.686(19)               | 155             | 1/2+x,3/2-y,2-z      |
|          | N1-H1C...O2A | 0.91                  | 1.90                    | 2.782(14)               | 164             | -1+x,y,z             |
|          | N1-H1C...O1B | 0.91                  | 1.86                    | 2.750 (2)               | 165             | -1+x,y,z             |

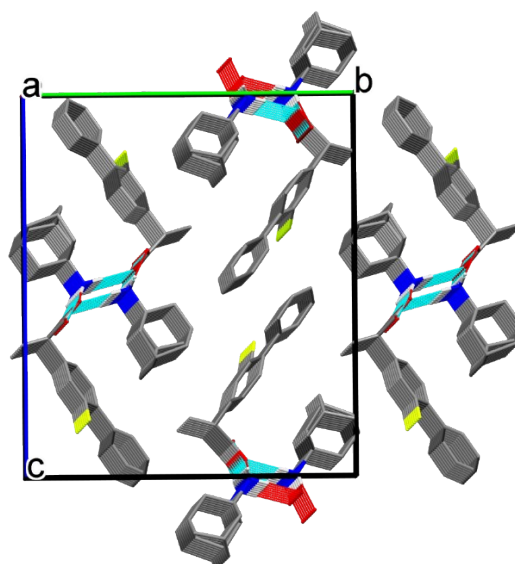

**Figure S34:** Packing diagram of **FLR·AMN** multidrug salt as viewed along crystallographic *b* axes.

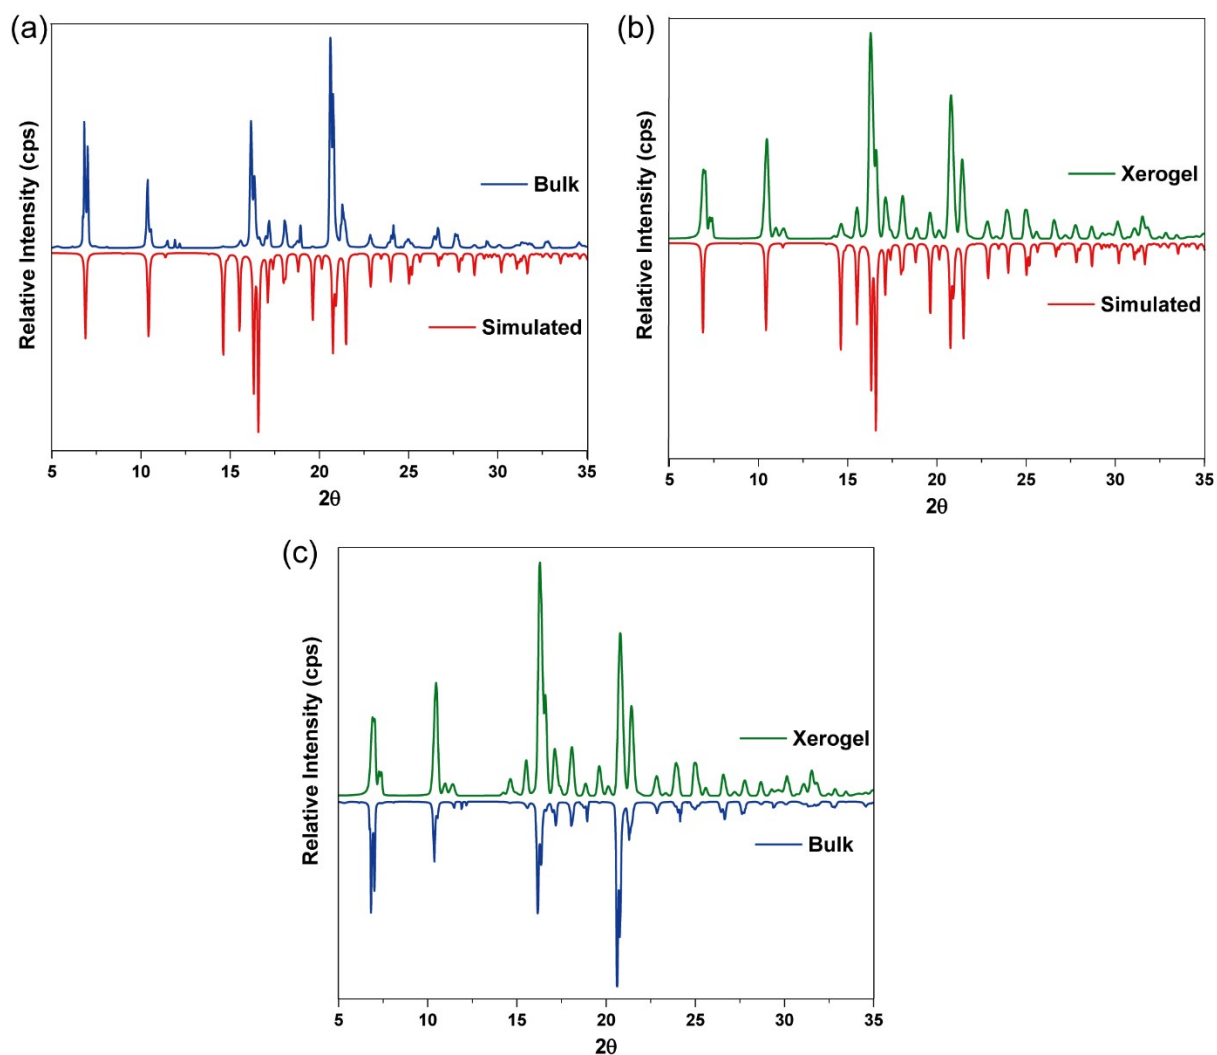

**Figure S35:** Comparative X-ray powder diffraction patterns of the gelator **FLR·AMN**; (a) simulated-bulk, (b) simulated-xerogel and (c) xerogel-bulk

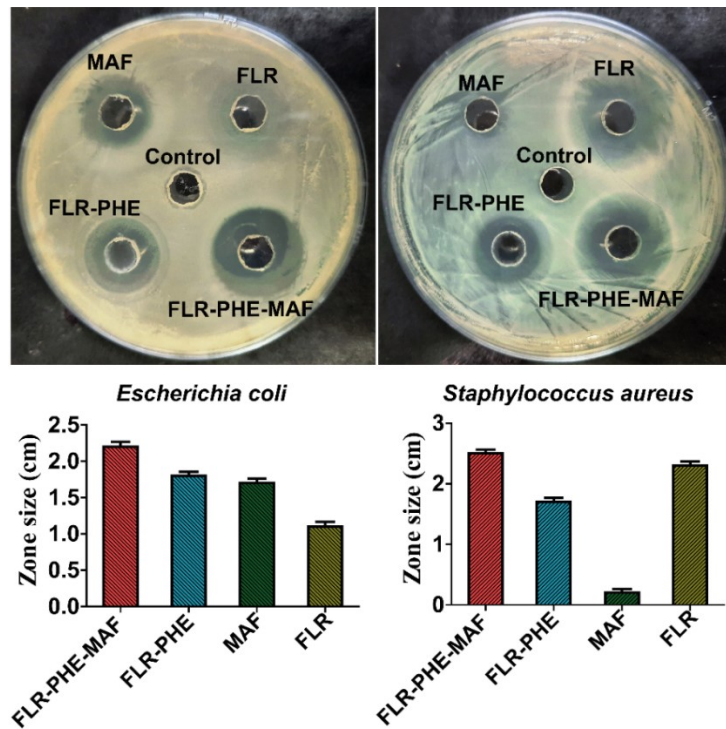

**Figure S36:** Antibacterial zone inhibition assay different components of multidrug hydrogelator salt **FLR·PHE·MAF** studied herein against *E. coli* and *S. aureus* bacteria.

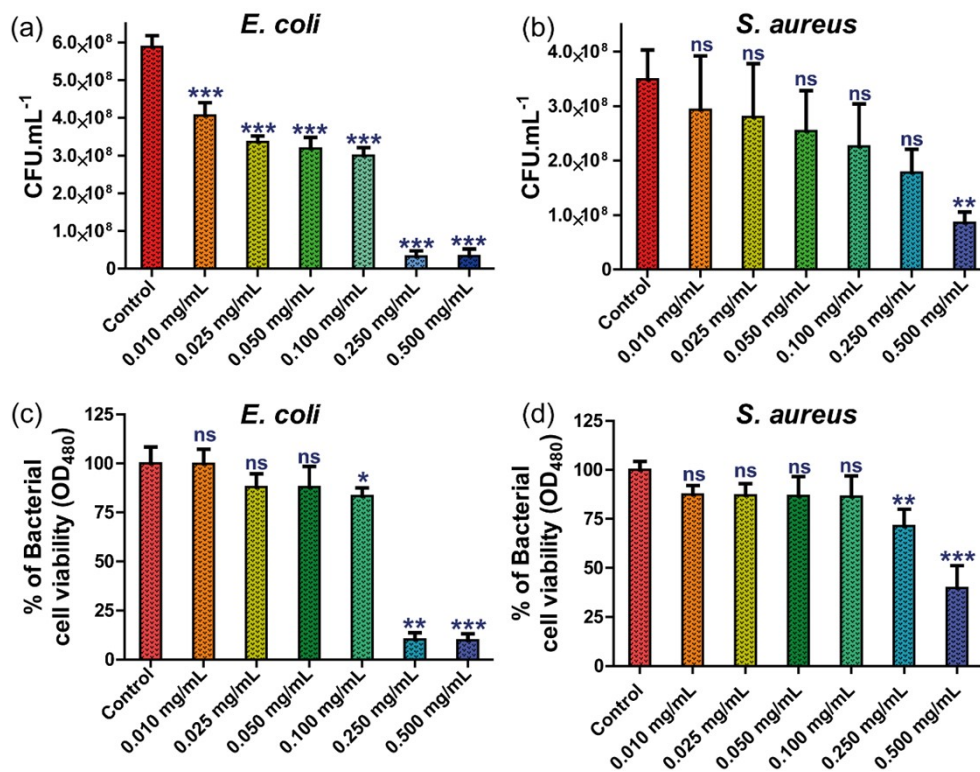

**Figure S37:** Antibacterial activity (turbidity assay at OD<sub>600</sub>) of multidrug hydrogelator salt **FLR·PHE·MAF** against (a) *E. coli* and (b) *S. aureus* bacteria; and antibacterial activity (INT assay at OD<sub>480</sub>) of multidrug hydrogelator salt **FLR·PHE·MAF** against (c) *E. coli* and (d) *S. aureus*. Data are represented considering mean ± SD where \*P < 0.05, \*\*P < 0.01, \*\*\*P < 0.001, and ns represents not significant.



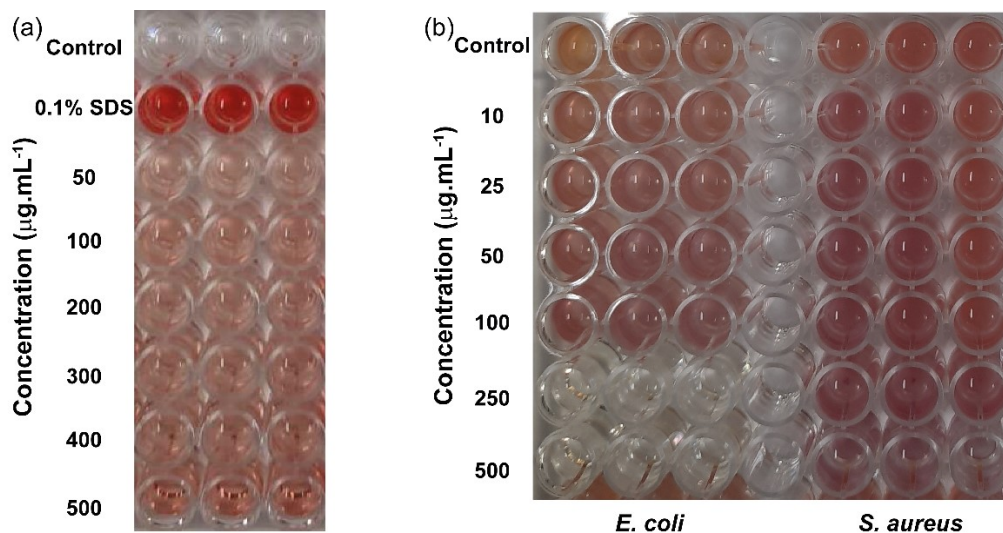

**Figure S38:** Optical images showing the activity of multidrug hydrogelator salt **FLR·PHE·MAF** (a) in haemolysis study to check cytocompatibility in living systems and (b) INT assay at different concentration of the multidrug to determine the MIC range against two bacteria.
